# Supplementary material for: Role of Tim4 in the regulation of ABCA1+ adipose tissue macrophages and post-prandial cholesterol levels
Source: PubMed Central journal article supplement (PMC8295389; doi:10.1038/s41467-021-24684-7), 2021-07-21
Supplement: 41467_2021_24684_MOESM1_ESM.pdf [file 41467_2021_24684_MOESM1_ESM.pdf]

**Role of Tim4 in the regulation of ABCA1<sup>+</sup> adipose tissue macrophages and post-prandial cholesterol levels. Magalhaes et al.**

**Supplementary Materials**

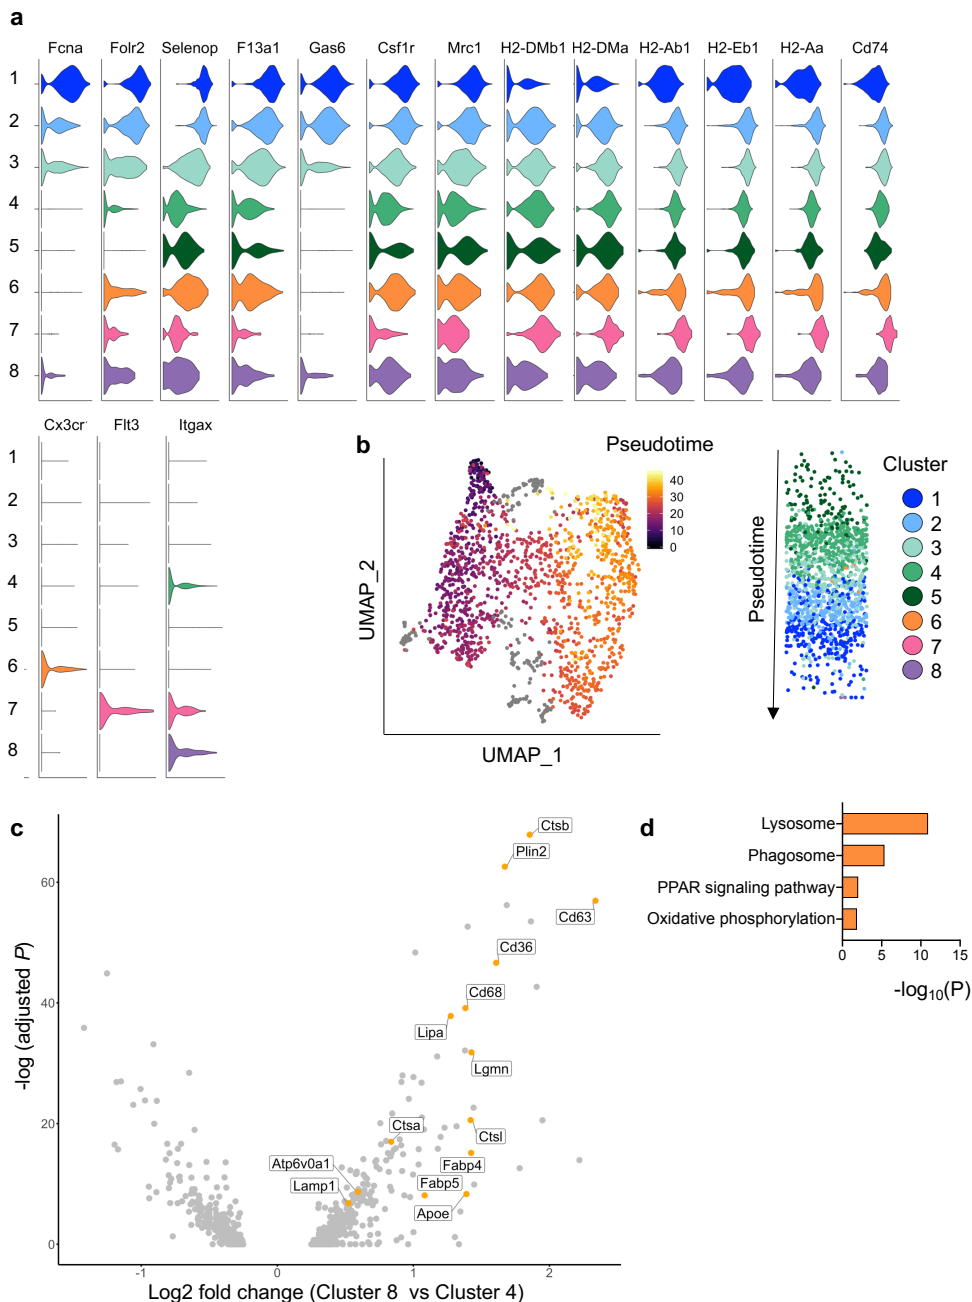

**Fig. S1. Characterization of ATM clusters.** **a** Violin plots of canonical ATM gene expression by cluster. **b** Slingshot analysis of ATM trajectory in mice fed overnight HFD. UMAP visualization of the Pseudotime values with Cluster 5 as starting point. **c** Volcano plot showing DEGs between cluster 8 (LAM ATMs) and cluster 4 (BM derived ATMs). Examples of DEGs distinguishing cluster 8 are shown in orange. **d** KEGG Pathway analysis on DEGs distinguishing cluster 8.

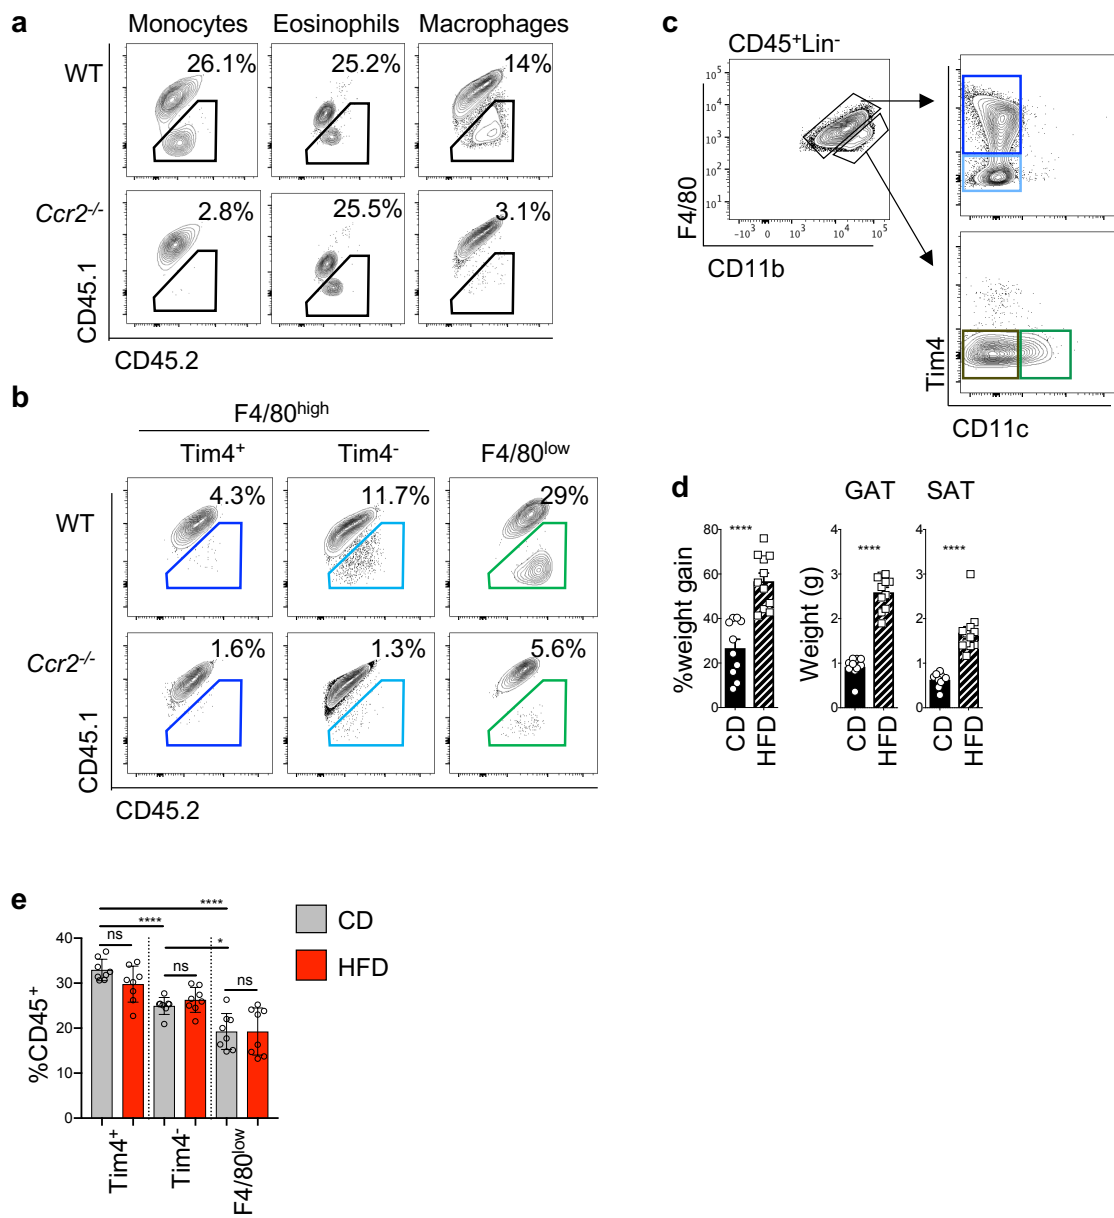

**Fig. S2. Analysis of non-host chimerism in protected BM chimeras.** **a, b** Flow-cytometric analysis of epididymal AT showing contour-plots and the gating of non-host cells in monocytes, eosinophils and macrophages (**a**) and in the indicated ATM subsets (**b**). **c** Flow-cytometric analysis of epididymal AT showing the gating of ATM subsets. **d** Weight gain of mice kept on CD or HFD and weight of their epididymal AT (EAT) and subcutaneous AT (SAT). Data pooled from 2 independent experiments with n=10 mice per group. **e** Quantification of the percentage of the indicated ATM subsets found in the CD45<sup>+</sup> cell fraction in mice kept on CD diet (grey) or fed HFD overnight (red). Data pooled from 2 independent experiments with n=8 mice per group. Error bars show SEM. Kruskal Wallis test with Dunn's multiple comparisons test or ANOVA with Sidak's multiple comparisons test were applied after assessing normality using D'Agostino and Pearson Normality test (**e**). Two-tailed Student's T-test was applied in **d**. Significant differences are indicated by \*\*\*\* P < 0.0001, \* P < 0.05, ns non-significant.

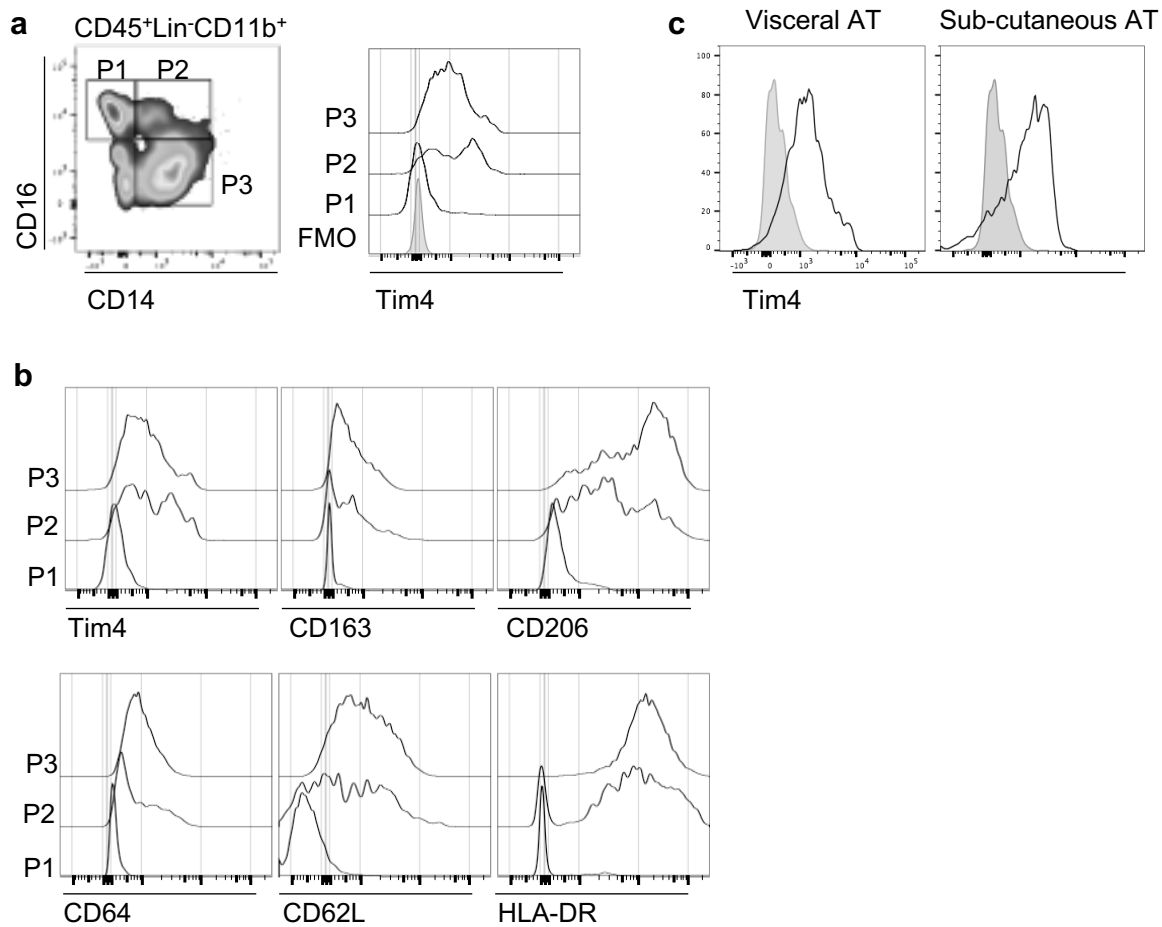

**Fig. S3. Analysis of human ATMs.** **a** Flow-cytometric analysis of ATMs in human omental AT with representative density plot of CD45<sup>+</sup>Lin<sup>-</sup>CD11b<sup>+</sup> cells showing CD16<sup>+</sup>CD14<sup>-</sup> ATMs (P1), CD16<sup>+</sup>CD14<sup>+</sup> ATMs (P2) and CD16<sup>-</sup>CD14<sup>+</sup> ATMs (P3) and histogram showing Tim4 expression in P1, P2 and P3. Fluorescence minus one (FMO) in grey. Lineage (Lin) includes CD19, CD3 and NCAM. **b** Histograms showing expression of common macrophage markers on the 3 subsets. **c** Histograms showing the expression of Tim4 on CD45<sup>+</sup>Lin<sup>-</sup>CD11b<sup>+</sup> ATMs in the omental and subcutaneous AT. Data representative of 3 patients.

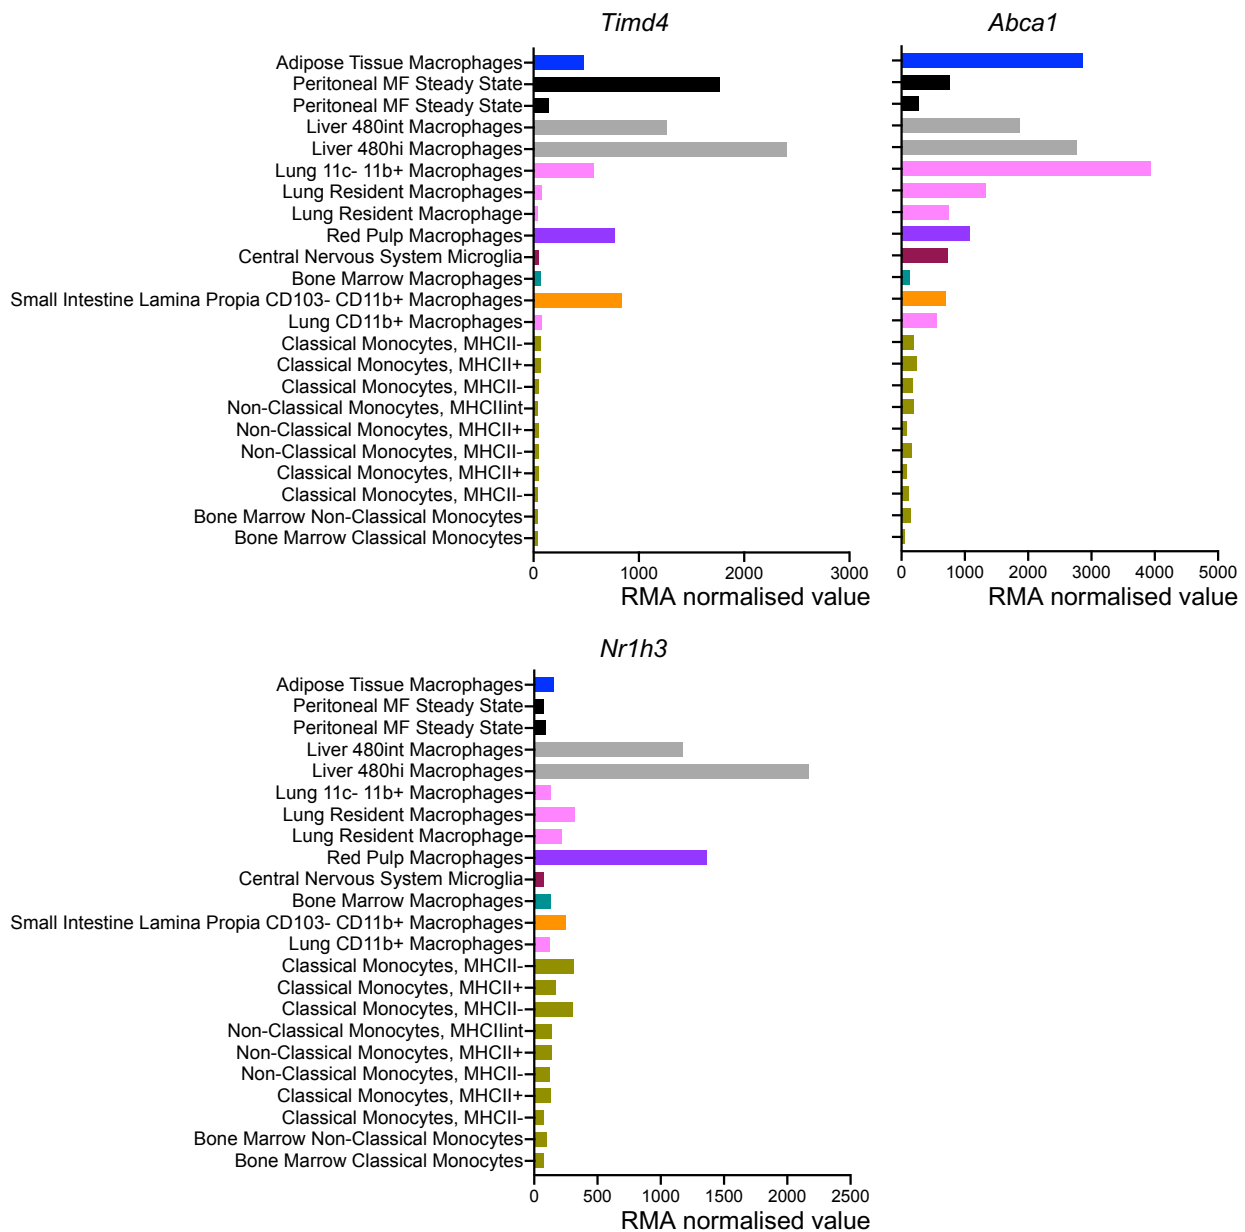

**Fig. S4. Expression of *Timd4*, *Abca1* and *Nr1h3* in macrophages and myeloid cells from different tissues.** Normalized expression of *Timd4* (left), *Abca1* (right) and *Nr1h3* (lower left) obtained from the ImmGen microarray dataset in ATM (blue) and peritoneal (black), liver (grey), lung, red pulp, microglia, bone marrow and lamina propria macrophages, as well as monocytes.

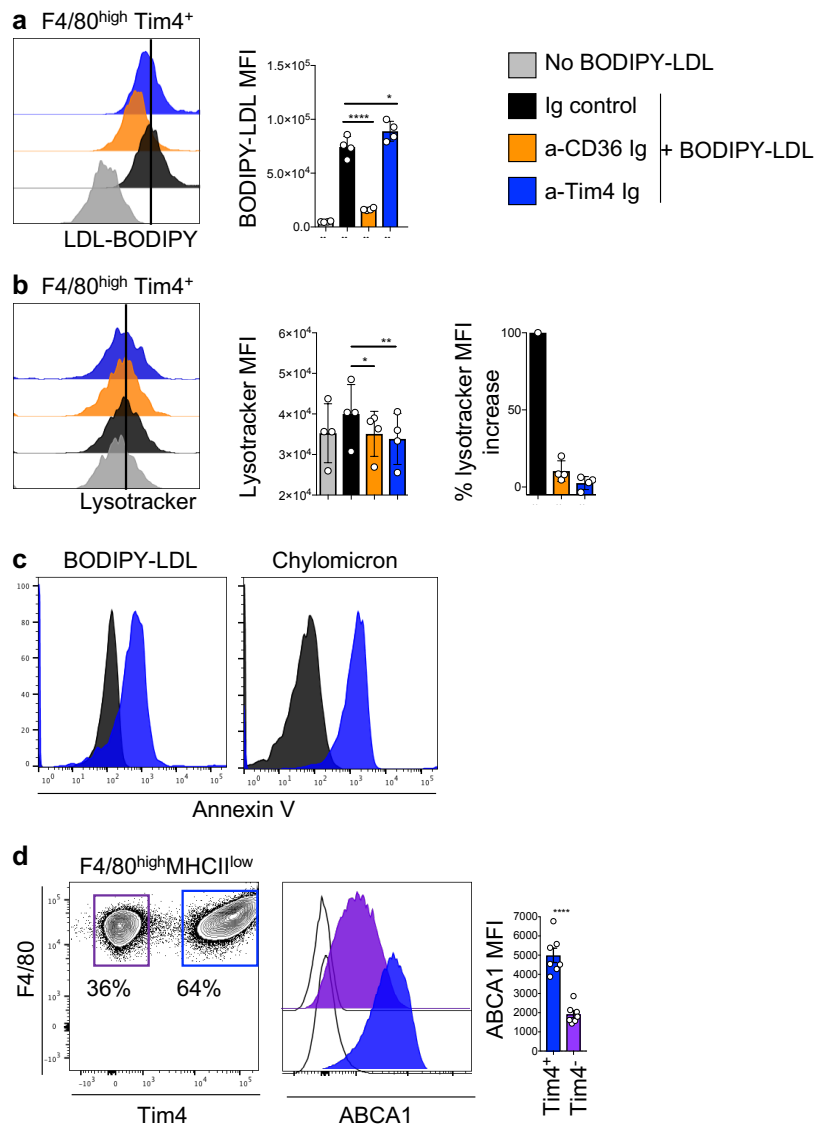

**Fig. S5. CD36 regulates LDL uptake by F4/80<sup>high</sup>Tim4<sup>+</sup> ATMs.** Adipose tissue cells were pre-incubated with blocking anti-CD36 IgG or blocking anti-Tim4 Ig or IgG control prior to incubation with BODIPY-LDL for 1 hour. **a, b** Flow-cytometric analysis showing histogram of BODIPY-LDL (**a**) and lysotracker (**b**) fluorescence intensity in F4/80<sup>high</sup>Tim4<sup>+</sup> ATMs, quantification of mean fluorescence intensity (MFI) of BODIPY-LDL and lysotracker and percentage increase in lysotracker MFI compared to no LDL-BODIPY. Cells with no LDL-BODIPY (grey), incubated 1 hour with LDL-BODIPY and Ig control (black), anti-CD36 (orange) or anti-Tim4 Ig (blue). To allow detection of Tim4 in cells incubated with anti-Tim4 Ig, Tim4 was detected using rat anti-Tim4 Ig plus secondary anti-Rat Ig-647. Data representative of 2 experiments with n=4 mice per group. **c** Flow-cytometric analysis showing histogram of Annexin-V of BODIPY-LDL and chylomicrons. **d** Flow-cytometric analysis showing gating of F4/80<sup>high</sup>Tim4<sup>+</sup> and F4/80<sup>high</sup>Tim4<sup>-</sup> peritoneal macrophages, histogram of ABCA1 and quantification of ABCA1 MFI in both macrophage populations. Data pooled from 2 independent experiments with n=8 mice per group. Error bars show SEM. Student's paired T-test (**a, b**), Two-tailed Student's T-test (**d**). Significant differences are indicated by \* P=<0.05, \*\* P=<0.01, \*\*\*\* P =<0.0001.

| Antigen Name                 | Conjugate    | Clone             | Manufacturer |
|------------------------------|--------------|-------------------|--------------|
| <b>Anti-mouse antibodies</b> |              |                   |              |
| ABCA1                        | Alexa-647    | MCA2681A647       | Bio-Rad      |
| CD11b                        | PE Dazzle    | M170              | Biologend    |
|                              | VioBlue      | REA592            | Miltenyi     |
| CD11c                        | BV605        | N418              | Biologend    |
|                              | APC-Vio770   | REA754            | Miltenyi     |
| CD115 (CSF1R)                | APC          |                   | Biologend    |
| CD19                         | BV421        | 6D5               | Biologend    |
| CD36                         | PE           | REA1184           | Miltenyi     |
| CD206                        | FITC         | MCA2235FA         | Miltenyi     |
| CD45.1                       | PE/Cy7       | A20               | Biologend    |
| CD45.2                       | BV450        | 104               | eBiosciences |
|                              | BV650        | 104               | Biologend    |
| F4/80                        | PE/Cy7       | BM8               | Biologend    |
|                              | FITC         | REA126            | Miltenyi     |
| HSP-70 (HSP1A1)              | FITC         | REA349            | Miltenyi     |
| Ki-67                        | FITC         | REA183            | Miltenyi     |
| LAMP1                        | PE           | REA792            | Miltenyi     |
| LAMP2                        | PE           | M3/84             | Miltenyi     |
| Ly6C                         | AF700        | HK1.4             | Biologend    |
| Ly6G                         | BV421        | 1A8               | Biologend    |
| Lyve1                        | AF660        | ALY7              | eBiosciences |
| MHCII IIA/IE                 | APCe780      | M5/114.15.2       | eBiosciences |
| RELMa                        | Unconjugated | Rabbit polyclonal | PeptoTech    |
| Siglec F                     | BV421        | E50-2440          | BD           |
| TCRb                         | BV421        | h57-597           | Biologend    |
| Tim4                         | PE           | RMT4-54           | Biologend    |
|                              | APC          |                   |              |
| <b>Anti-Human antibodies</b> |              |                   |              |
| CD3                          | PE           | HIT3a             | Biologend    |
| CD11b                        | AF700        | M1/70             | Biologend    |
| CD14                         | e450         | HCD14             | Biologend    |
| CD16                         | BV711        | 3G8               | Biologend    |
| CD19                         | PE           | HIB19             | Biologend    |
| CD45                         | BV650        | HI30              | Biologend    |
| CD64                         | APCcy7       | 10.1              | Biologend    |
| CD62L                        | PerCPcy5     | DREG-56           | Biologend    |
| CD163                        | BV605        |                   | Biologend    |
| CD206                        | AF647        | M1/70             | Biologend    |
| HLA-DR                       | FITC         | L243              | Biologend    |
| NCAM                         | PE           | MEM188            | Biologend    |
| <b>Secondary antibody</b>    |              |                   |              |
| Goat-anti Rabbit Ig          | Xenon-488    |                   | Invitrogen   |
| Goat-anti Rat Ig             | APC          |                   | Biologend    |

**Table S1. List of antibodies used in the study.**
